# Supplementary material
Source: publisher figshare collection journal article supplement (https://tandf.figshare.com/articles/dataset/_/4679230)
Supplement: Supplementary file 1 [file 1]

# Mesoproterozoic fluid events affecting Archean crust in the northern Olympic Cu–Au Province, Gawler Craton: insights from $^{40}\text{Ar}/^{39}\text{Ar}$ thermochronology

A. Reid<sup>a,b</sup>, F. Jourdan<sup>c</sup> and E. Jagodzinski<sup>a</sup>

<sup>a</sup>Geological Survey of South Australia, Department of State Development, GPO Box 320, Adelaide, SA 5001, Australia. <sup>b</sup>Department of Earth Sciences, School of Physical Sciences, University of Adelaide, SA 5005, Australia. <sup>c</sup>Department of Applied Geology, Curtin University, GPO Box U1987, Perth WA 6845, Australia.

## SUPPLEMENTARY PAPERS

*Australian Journal of Earth Sciences* (2017) 64 (1),  
<http://dx.doi.org/10.1080/08120099.2017.1263806>

-----  
Copies of Supplementary Papers may be obtained from the Geological Society of Australia's website ([www.gsa.org.au](http://www.gsa.org.au)), the Australian Journal of Earth Sciences website ([www.ajes.com.au](http://www.ajes.com.au)) or from the National Library of Australia's Pandora archive (<http://nla.gov.au/nla.arc-25194>).  
-----

## Supplementary Papers

**Appendix 1.** Summary of U–Pb zircon data obtained from samples 1965413 and 1967789.

**Appendix 2.** Summary of  $^{40}\text{Ar}/^{39}\text{Ar}$  data obtained during this study.
